# Supplementary material
Source: publisher figshare collection journal article supplement (https://acs.figshare.com/ndownloader/files/15192680)
Supplement: Supplementary file 1 [file 15192680]

## Supporting Information (SI)

### Fabrication of “Zn<sup>2+</sup> salt-bondings” cross-linked SBS-g-COOH/ZnO composites: thiol-ene reaction modification of SBS, structure, high modulus and shape memory properties

Mengwen Yan<sup>1</sup>, Liming Cao<sup>1</sup>, Chuanhui Xu<sup>2\*</sup>, Yukun Chen<sup>1\*</sup>

1. Lab of Advanced Elastomer, School of Mechanical and Automotive Engineering, South China University of Technology, Guangzhou 510640, China

2. School of Chemistry and Chemical Engineering, Guangxi University, Nanning 530004, China

Corresponding Author: Yukun Chen ([cyk@scut.edu.cn](mailto:cyk@scut.edu.cn)); Chuanhui Xu ([xuhuiyee@gxu.edu.cn](mailto:xuhuiyee@gxu.edu.cn)).

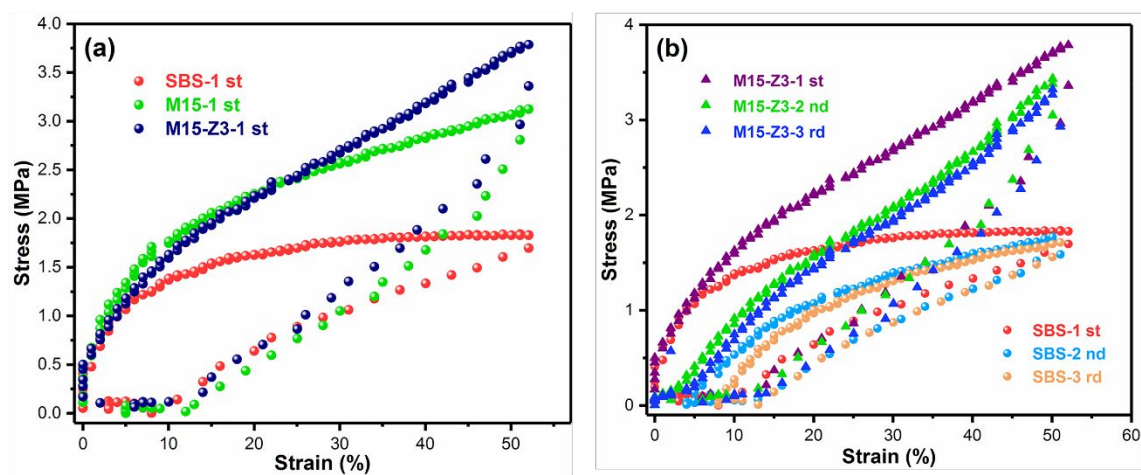

**Figure S1.** Loading-unloading curves of (a) pure SBS, M15 and M15-Z3 under first cycle and (b) pure SBS and M15-Z3 under three cycles with a strain of 50% at room temperature.

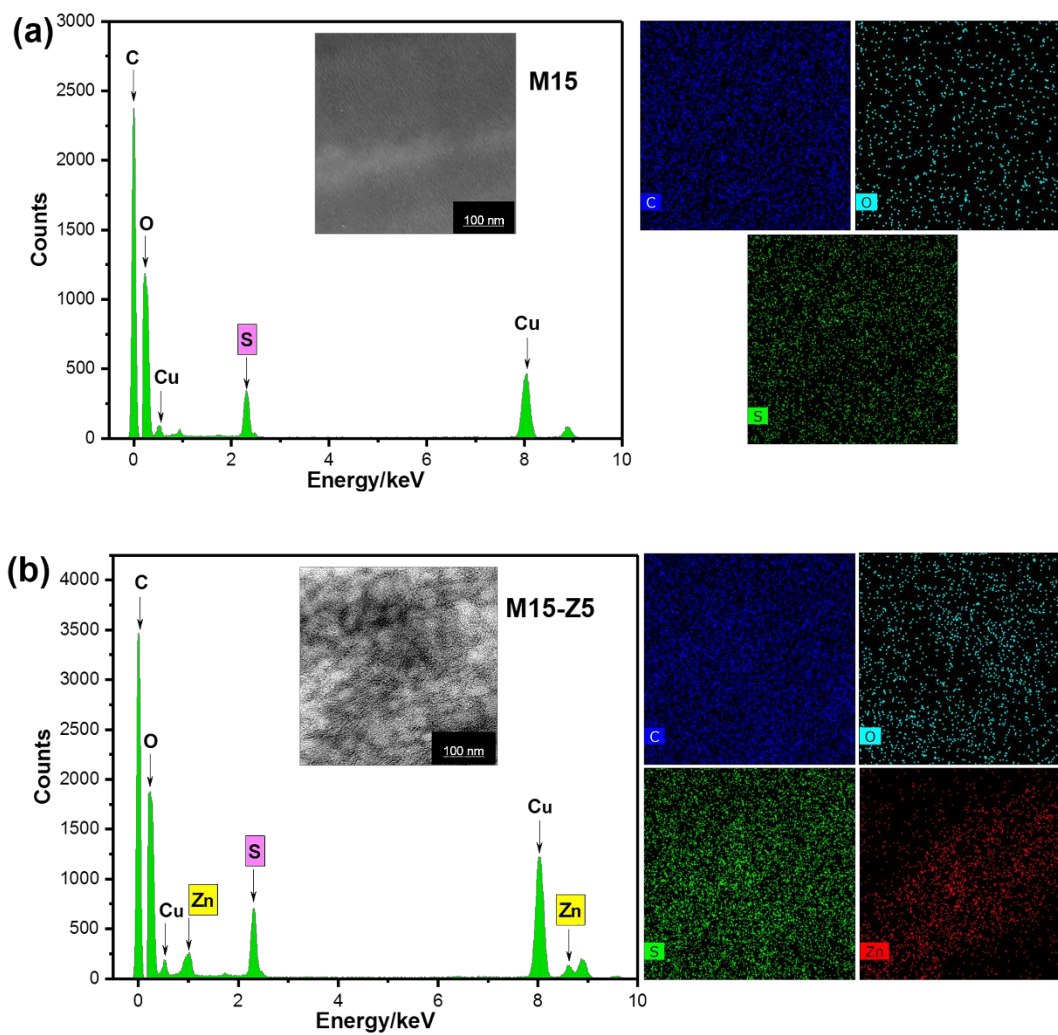

**Figure S2.** TEM-EDS analyses and mapping images of (a) M15 and (b) M15-Z5.

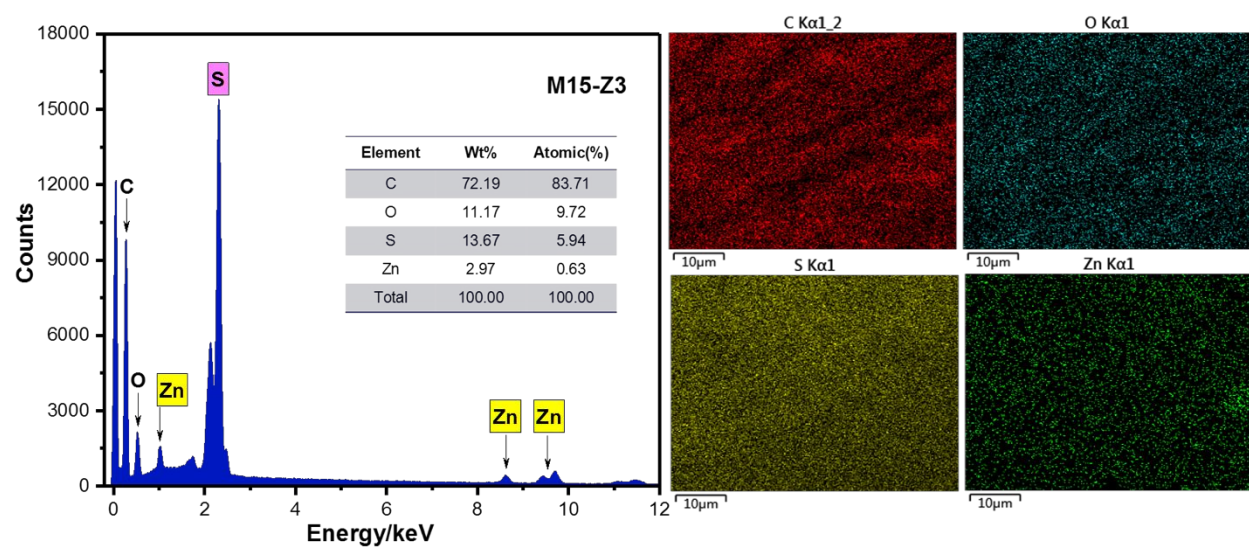

**Figure S3.** SEM-EDS analysis and mapping images of M15-Z3.
